# Supplementary material
Source: Springer Nature journal article supplement (https://www.springermedizin.de/resource/supplementary/12904_2012_155_MOESM6_ESM.pdf/9517736)
Supplement: MOESM6 [file 9517736]

**Potentially relevant papers identified through electronic searches and screened for retrieval**  
(n = 839)

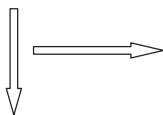

**Papers retrieved for more detailed evaluation**  
(n = 264)

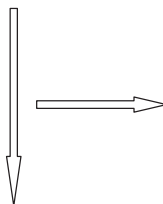

**Papers included**  
(n = 140)

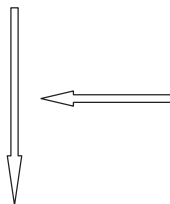

**Papers included in the review** (n=240),  
different studies (n=210)

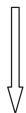

**Studies included in analysis of percentages with a home preference**  
(n = 130)

**Papers excluded with reasons (n=575):**

Relevant comments (n=92)  
Not relevant comments (n=98)  
No assessment/exploration of preferences for place of end of life care or place of death (n=225)  
Case stories (n=49)  
Children (n=34)  
Relevant reviews (n=21)  
Papers in other languages (n=19)  
Unpublished material (n=10)  
Not relevant reviews (n=22)  
Legal analysis (n=2)  
Books (n=3)

**Papers excluded with reasons (n=124):**

No assessment/exploration of preferences for place of end of life care or place of death (n=100)  
Relevant comments (n=12)  
Not relevant comments (n=2)  
Case stories (n=6)  
Unpublished material (n=3)  
Unreachable (n=1)

**Papers identified through handsearches (n=28)**

**Papers identified through follow up of reference lists (n=67):**  
Tacking reference lists of relevant reviews (n=20)  
Tracking reference lists of included papers (n=47)

**Papers spontaneously provided by authors (n=5)**
